# Supplementary material
Source: Research Square preprint supplement (doi:10.21203/rs.3.rs-10049392/v1)
Supplement: Supplementary file 1 [file 4728532a22f31ff52d725d34.docx]

**Supporting Information**

**Biological Fate of Food-Borne Microplastics: Generation Processes and In Vivo Toxicity**


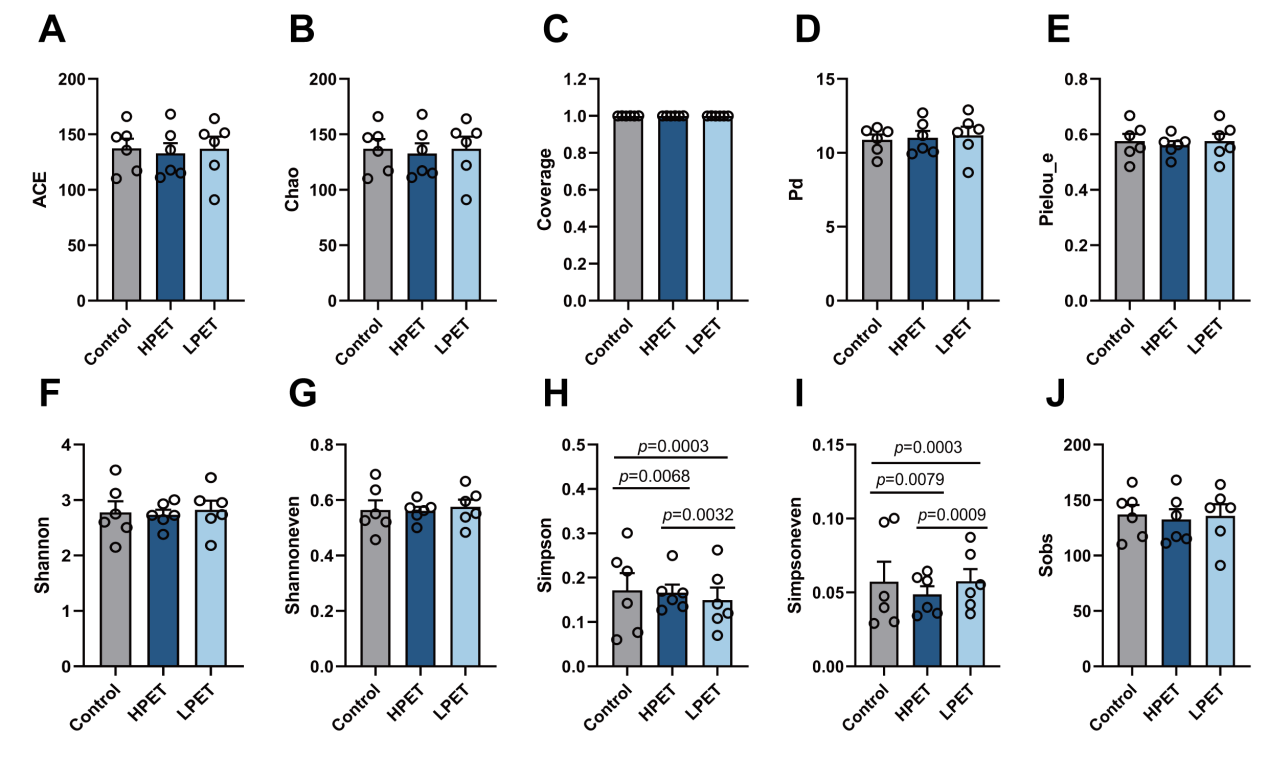


Fig.S1. Evaluation of ecological species richness of gut microbial communities.
